# Supplementary material
Source: PubMed Central journal article supplement (PMC7896300)
Supplement: pnas.2009475118.sapp.pdf [file pnas.2009475118.sapp.pdf]

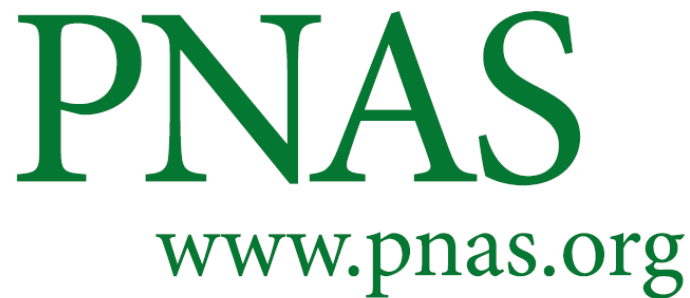

## Supplementary Information for

### The *mop1* (*mediator of paramutation1*) mutation affects the recombination landscape in maize

Meixia Zhao<sup>a, 1</sup>, Jia-Chi Ku<sup>b</sup>, Beibei Liu<sup>a</sup>, Diya Yang<sup>a</sup>, Liangwei Yin<sup>a</sup>, Tyshawn J. Ferrell<sup>a</sup>, Claire E. Stoll<sup>a</sup>, Wei Guo<sup>c</sup>, Xinyan Zhang<sup>d</sup>, Dafang Wang<sup>e</sup>, Chung-Ju Rachel Wang<sup>b</sup>, Damon Lisch<sup>c, 1</sup>

<sup>a</sup>Department of Biology, Miami University, Oxford, OH 45056

<sup>b</sup>Institute of Plant and Microbial Biology, Academia Sinica, Taipei, 11529 TAIWAN

<sup>c</sup>Department of Botany and Plant Pathology, Purdue University, West Lafayette, IN 47907

<sup>d</sup>Shenzhen Branch, Guangdong Laboratory for Lingnan Modern Agriculture, Genome Analysis Laboratory of the Ministry of Agriculture, Agricultural Genomics Institute at Shenzhen, Chinese Academy of Agricultural Sciences, Shenzhen, 518120, China

<sup>e</sup>Division of Math and Sciences, Delta State University, Cleveland, MS, USA 38733

Email: [meixiazhao@miamioh.edu](mailto:meixiazhao@miamioh.edu) and [dlish@purdue.edu](mailto:dlish@purdue.edu).

#### This PDF file includes:

Figures S1 to S3  
Tables S1 to S5  
Legends for Datasets S1 to S4  
SI References

#### Other supplementary materials for this manuscript include the following:

Datasets S1 to S4

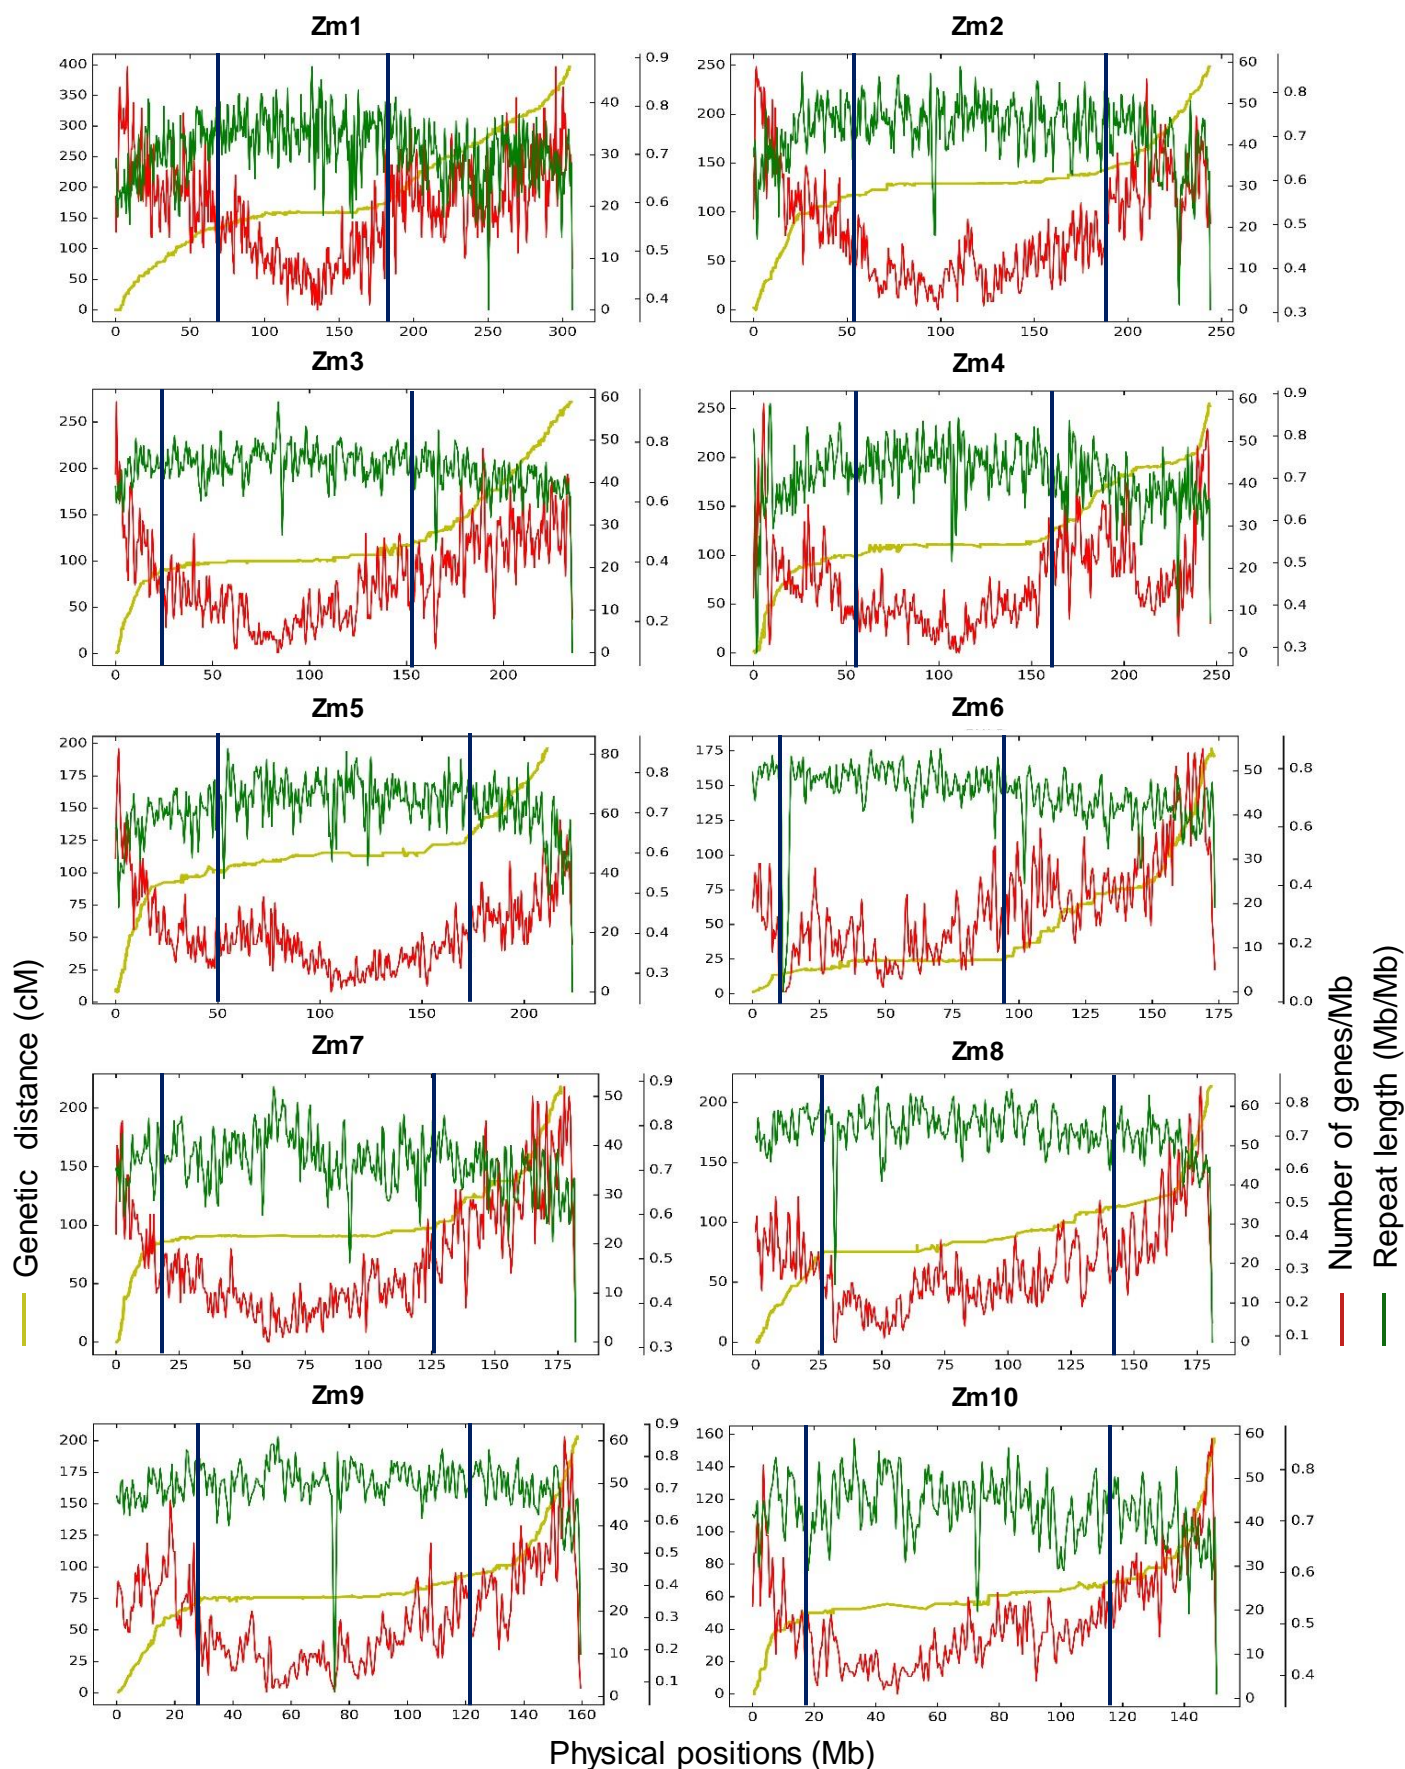

**Fig. S1. Identification of pericentromeric regions and chromosomal arms of the ten maize chromosomes.**

Red and green curves represent gene densities (no. of genes/Mb) and repeat length (Mb/Mb), which was measured in 1 Mb windows with 500 kb shifts. Yellow green curve demonstrates 6257 genetic markers in the integrated map previously described (1). Dark blue vertical bars indicate position of transition from chromosomal arms to pericentromeric regions. The region between two vertical bars for each chromosome was defined as pericentromeric regions. The regions outside of the vertical bars were defined as chromosomal arms.

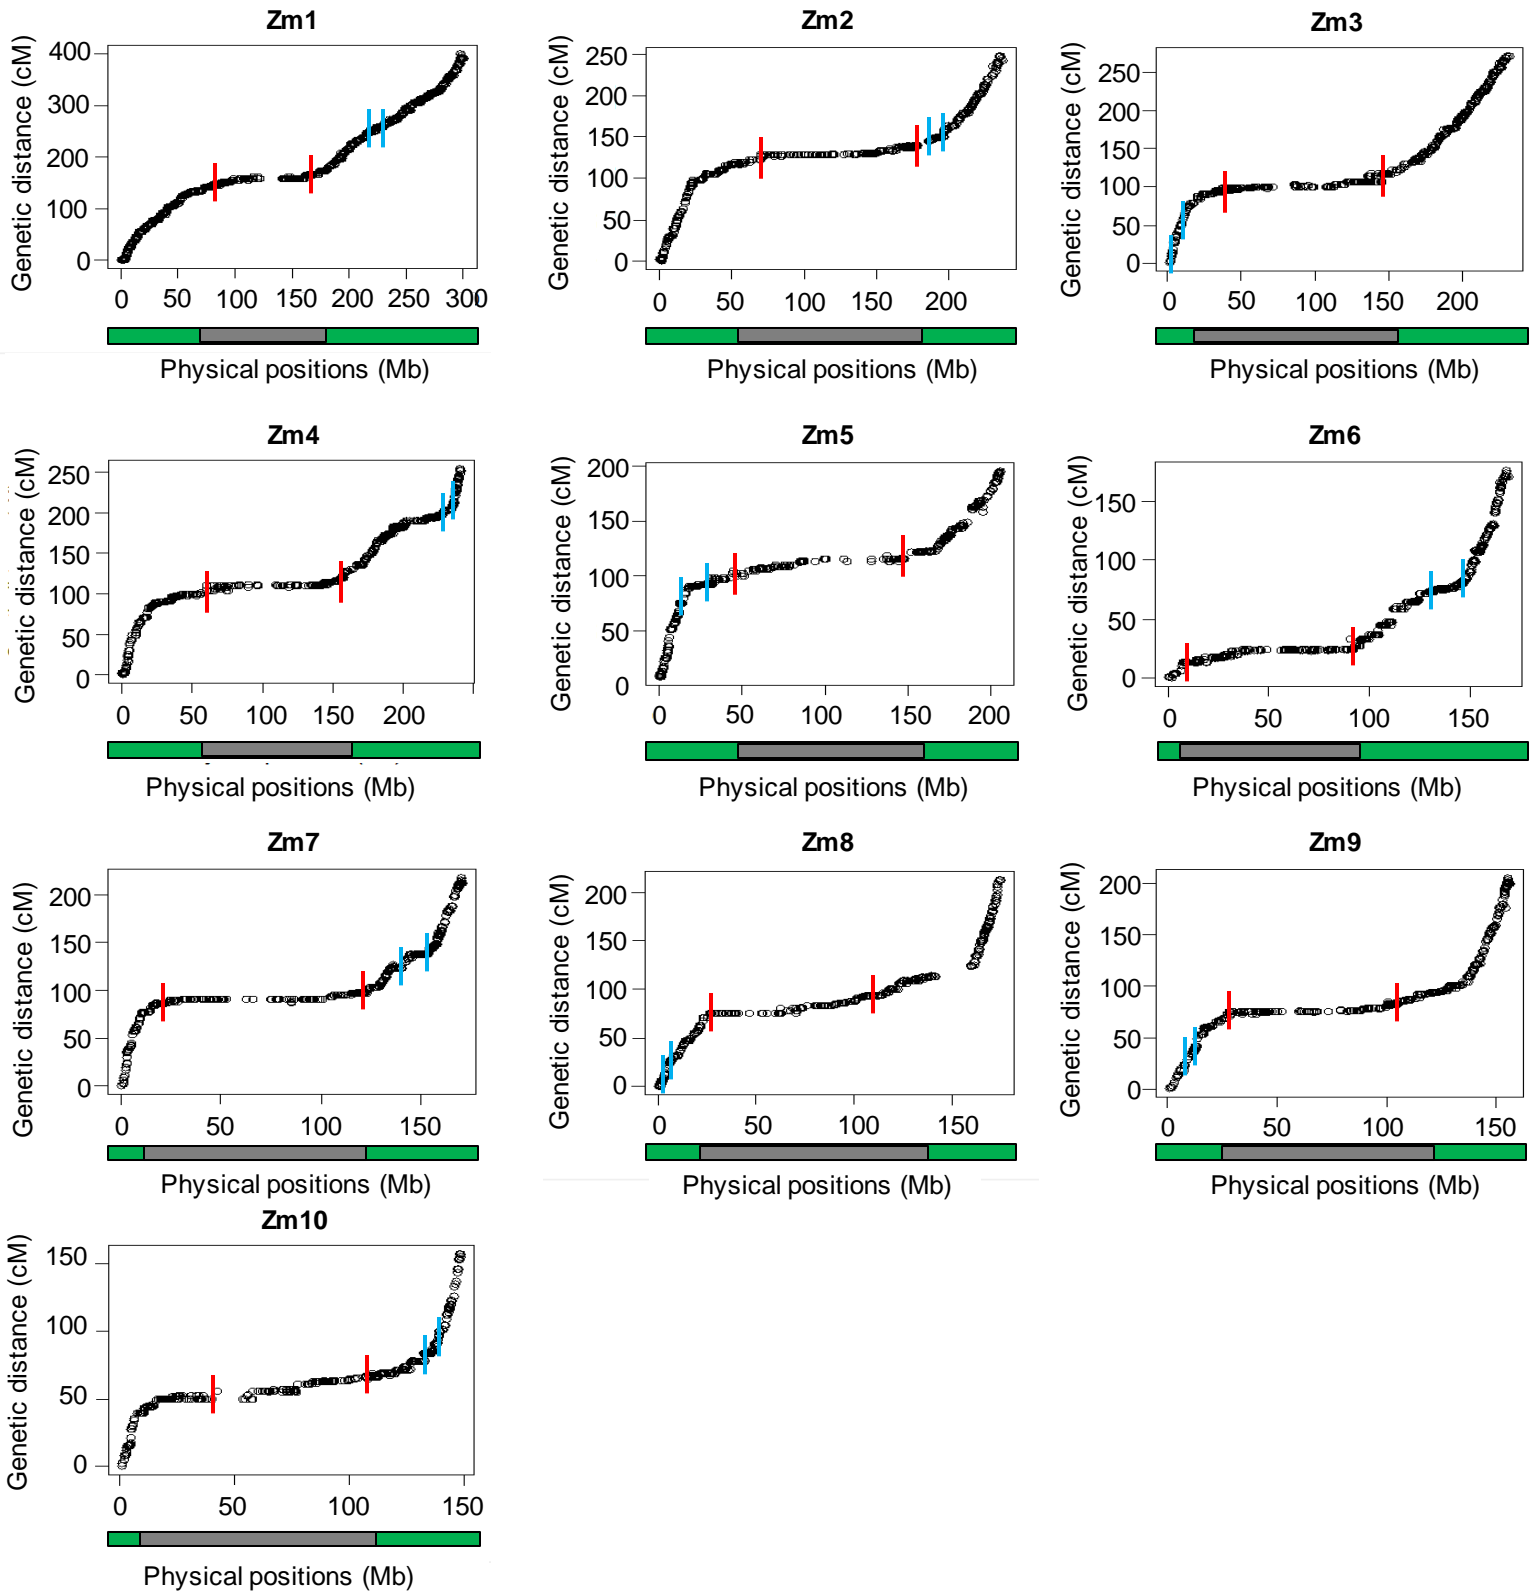

**Fig. S2. Locations of marker pairs of the ten maize chromosomes selected to compare the recombination frequencies between *mop1* mutant and its heterozygous sibling.** Each panel was generated by MaryMap using the available markers in the reference B73 genome (black dots) (2). The vertical bars represent polymorphic InDel markers between B73 and Mo17. Red and blue bars represent marker pairs located in pericentromeric regions and chromosomal arms, respectively. Within each panel, the slope of the line indicates gene density; a greater slope corresponds to chromosomal arms that have a high gene density. Green and grey bars indicate the chromosomal arms and pericentromeric regions of each chromosome, respectively.

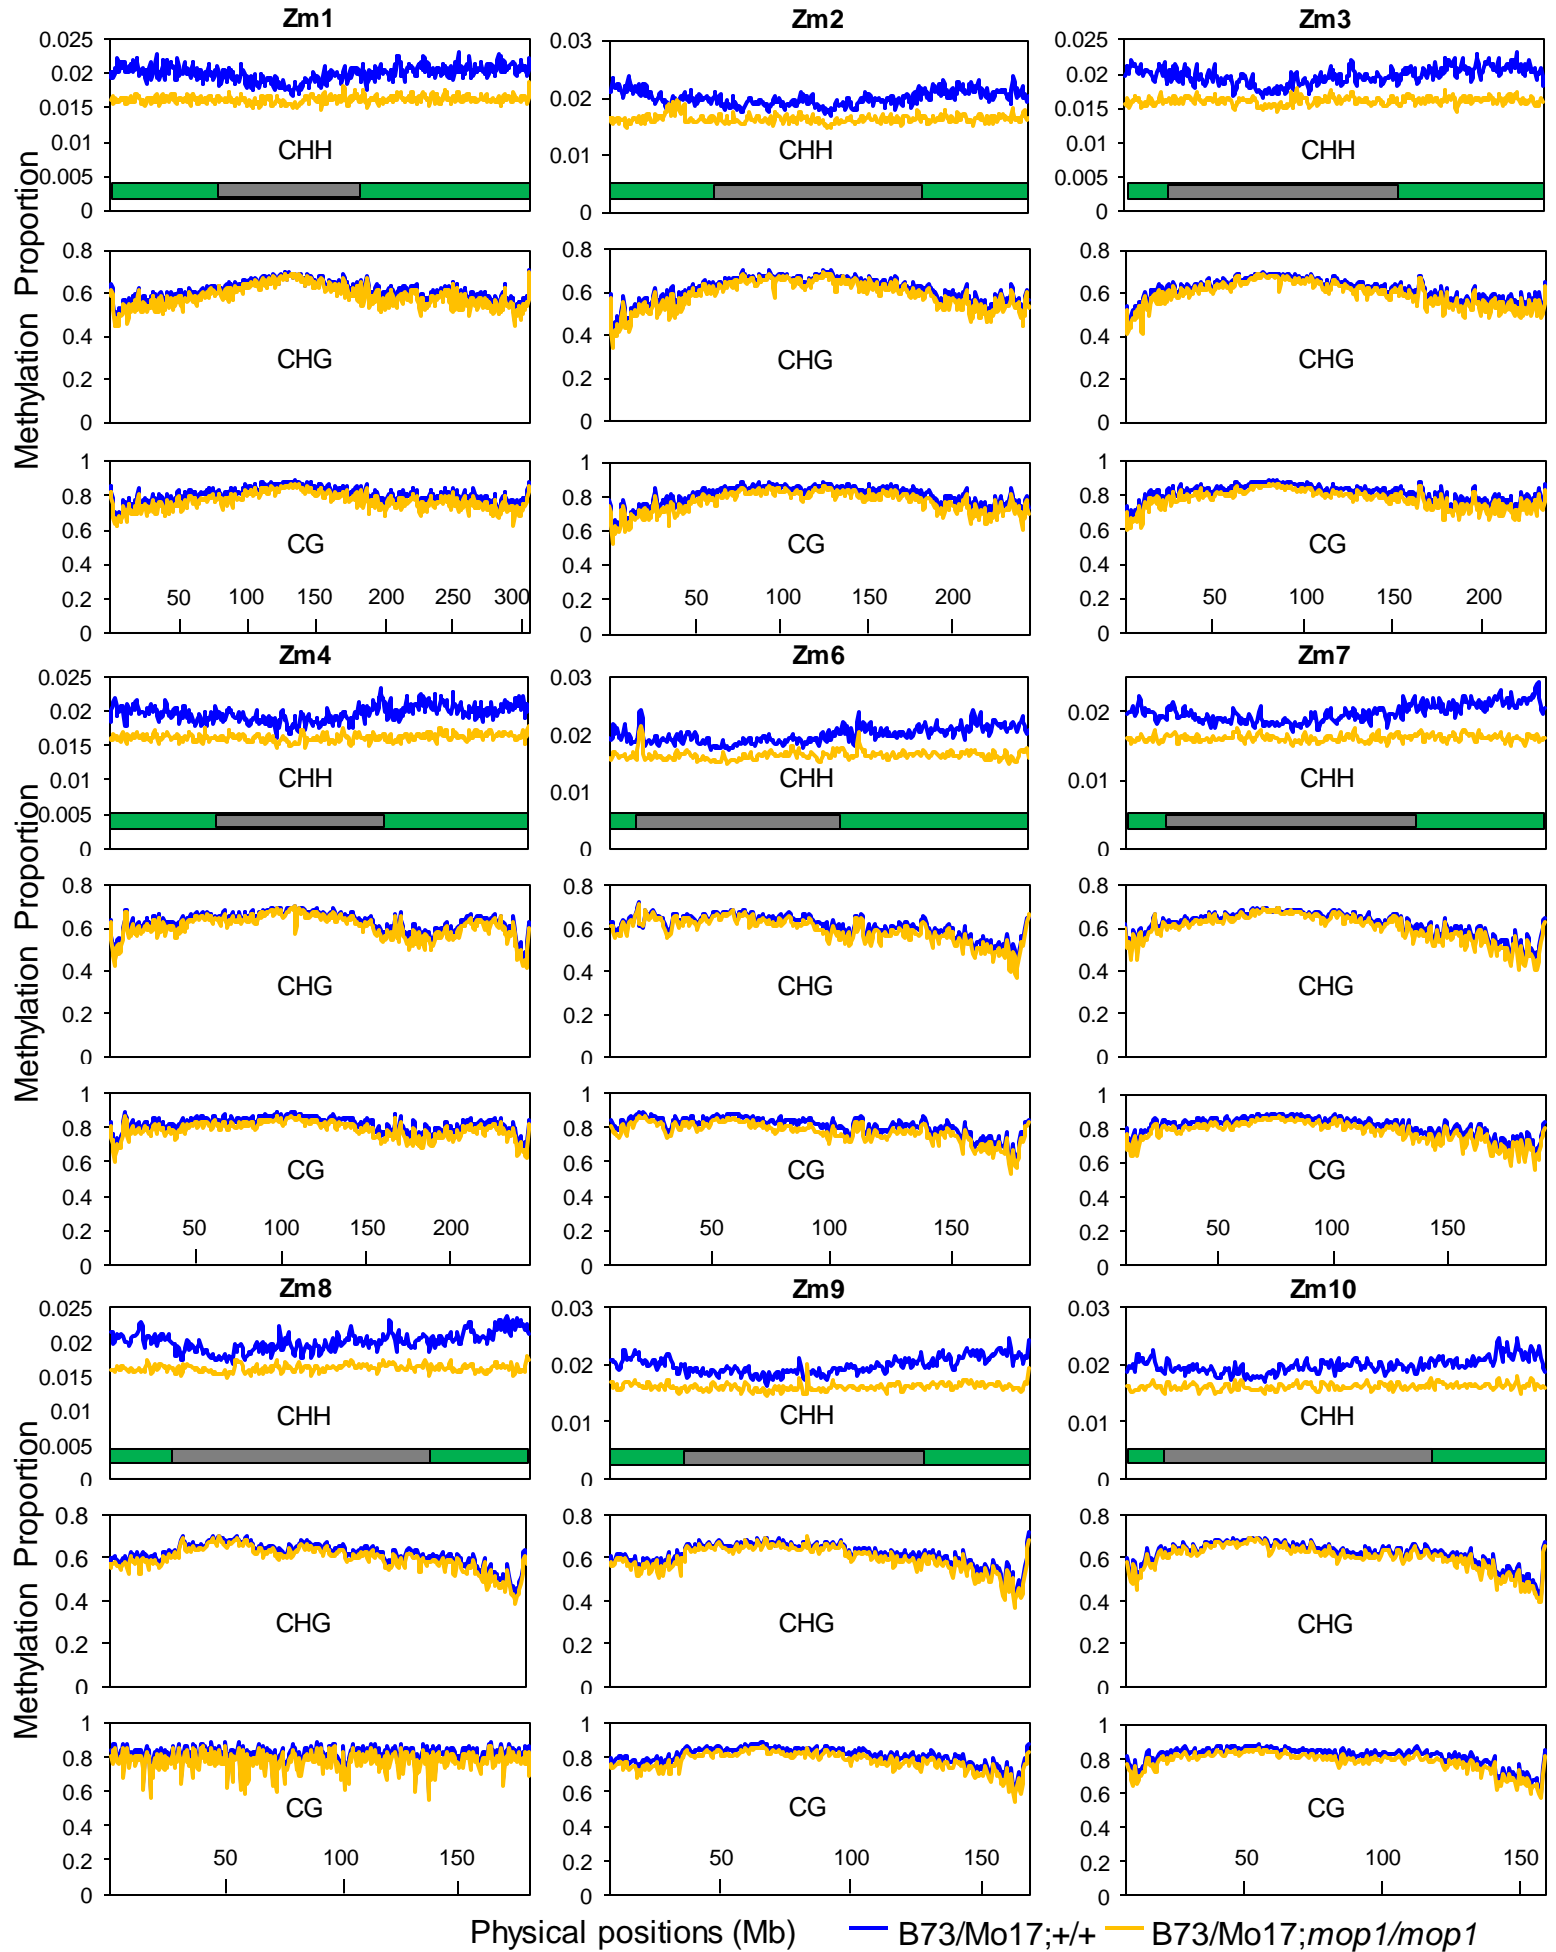

**Fig. S3. Patterns of DNA methylation along the nine chromosomes in immature anthers.**

Methylation for each sample was calculated as the proportion of methylated C over total C in each sequence context (CG, CHG, and CHH) averaged for each 1Mb windows with 500 kb shifts. The average methylation levels were determined by combining the biological replicates for each genotype.

**Table S1. Comparisons of the pericentromeric regions and chromosomal arms of the ten chromosomes of the maize genome**

| Features                            | Pericentromeric regions |                | Chromosomal arms |                | <i>P</i> Values <sup>a</sup> | Ratio |
|-------------------------------------|-------------------------|----------------|------------------|----------------|------------------------------|-------|
|                                     | Total                   | Average ± SD   | Total            | Average ± SD   |                              |       |
| Sizes (Mb)                          | 1060.89                 | 106.09 ± 13.67 | 1045.45          | 104.55 ± 44.60 | 0.9142                       | 1.01  |
| LTR-RTs (Mb) <sup>b</sup>           | 1141.86                 | 114.19 ± 15.17 | 1014.99          | 101.50 ± 42.57 | 0.3486                       | 1.13  |
| DNA TEs (Mb) <sup>b</sup>           | 4.29                    | 0.43 ± 0.08    | 6.28             | 0.63 ± 0.25    | 0.0310                       | 0.68  |
| Helitrons (Mb) <sup>b</sup>         | 186.14                  | 18.61 ± 2.11   | 199.81           | 19.98 ± 8.41   | 0.6168                       | 0.93  |
| No. of genes                        | 11,961                  | 1,196 ± 207    | 27,044           | 2,704 ± 966    | 0.0010                       | 0.44  |
| Gene densities (no./Mb)             | -                       | 11.29 ± 1.33   | -                | 26.54 ± 2.4    | <0.0001                      | 0.43  |
| Recombination rates (cM/Mb)         | -                       | 0.20 ± 0.07    | -                | 2.17 ± 0.47    | <0.0001                      | 0.09  |
| Recombination frequencies (cM/gene) | -                       | 0.017 ± 0.006  | -                | 0.081 ± 0.01   | <0.0001                      | 0.21  |

<sup>a</sup> Student's paired *t* test

<sup>b</sup> The overall contribution of the transposable elements are only approximations due to difficulties in annotation.

**Table S2. Comparison of recombination frequency in the second biological replicate comparing B73/Mo17;*mop1/mop1* and B73/Mo17;+/+**

| Chromosome | Marker pairs | Marker position (version 2) | Marker position (version 4) | Marker location | B73/Mo17;+/+ |              |                       | B73/Mo17; <i>mop1/mop1</i> |              |                       | Recombinants in <i>mop1/mop1</i> vs. +/+ (%) | P value of $\chi^2$ test |
|------------|--------------|-----------------------------|-----------------------------|-----------------|--------------|--------------|-----------------------|----------------------------|--------------|-----------------------|----------------------------------------------|--------------------------|
|            |              |                             |                             |                 | Parental     | Recombinants | Genetic distance (cM) | Parental                   | Recombinants | Genetic distance (cM) |                                              |                          |
| 1          | DEL.17179    | 217,420,353                 | 220,618,790                 | Arms            | 135          | 17           | 11.18                 | 115                        | 15           | 11.54                 | 3.1                                          | 0.8980                   |
| 1          | DEL.18364    | 231,506,640                 | 235,100,067                 | Arms            | 138          | 17           | 10.97                 | 124                        | 9            | 6.77                  | -62.1                                        | 0.1211                   |
| 2          | INS.39880    | 186,567,278                 | 192,152,725                 | Arms            | 97           | 38           | 28.15                 | 115                        | 11           | 8.73                  | -222.4                                       | <0.0001                  |
| 2          | DEL.50069    | 196,147,461                 | 202,422,924                 | Arms            | 126          | 22           | 14.86                 | 113                        | 15           | 11.72                 | -26.8                                        | 0.3170                   |
| 4          | DEL.87712    | 236,702,644                 | 241,951,472                 | Arms            | 106          | 42           | 28.38                 | 86                         | 40           | 31.75                 | 10.6                                         | 0.4018                   |
| 4          | DEL.88225    | 241,232,962                 | 246,774,777                 | Arms            | 127          | 26           | 16.99                 | 114                        | 17           | 12.98                 | -30.9                                        | 0.2210                   |
| 5          | INS.72736    | 15,139,215                  | 15,682,111                  | Arms            | 131          | 18           | 12.08                 | 106                        | 20           | 15.87                 | 23.9                                         | 0.1915                   |
| 5          | INS.74132    | 31,823,952                  | 32,947,841                  | Arms            | 133          | 15           | 10.14                 | 115                        | 18           | 13.53                 | 25.1                                         | 0.1940                   |
| 5          | DEL.101474   | 201,464,758                 | 206,962,581                 | Arms            | 138          | 14           | 9.21                  | 120                        | 11           | 8.40                  | -9.7                                         | 0.7474                   |
| 5          | INS.82912    | 215,984,724                 | 221,868,273                 | Arms            | 150          | 13           | 7.98                  | 128                        | 4            | 3.03                  | -163.2                                       | 0.0360                   |
| 7          | DEL.127155   | 140,576,071                 | 145,310,108                 | Arms            | 131          | 13           | 9.03                  | 113                        | 5            | 4.24                  | -113.1                                       | 0.0694                   |
| 7          | INS.103353   | 154,057,203                 | 159,368,007                 | Arms            | 125          | 21           | 14.38                 | 106                        | 17           | 13.82                 | -4.1                                         | 0.8589                   |
| 7          | DEL.116777   | 1,520,755                   | 1,624,194                   | Arms            | 131          | 18           | 12.08                 | 106                        | 20           | 15.87                 | 23.9                                         | 0.1915                   |
| 7          | DEL.117010   | 3,194,424                   | 3,343,108                   | Arms            | 133          | 15           | 10.14                 | 115                        | 18           | 13.53                 | 25.1                                         | 0.1940                   |
| 10         | INS.29294    | 144,934,439                 | 145,650,284                 | Arms            | 138          | 14           | 9.21                  | 120                        | 11           | 8.40                  | -9.7                                         | 0.7474                   |
| 10         | INS.29644    | 148,410,425                 | 149,178,420                 | Arms            | 150          | 13           | 7.98                  | 128                        | 4            | 3.03                  | -163.2                                       | 0.0360                   |
| 1          | INS.6094     | 76,569,094                  | 78,066,611                  | Peri.           | 131          | 13           | 9.03                  | 113                        | 5            | 4.24                  | -113.1                                       | 0.0694                   |
| 1          | INS.10411    | 170,185,497                 | 172,063,830                 | Peri.           | 125          | 21           | 14.38                 | 106                        | 17           | 13.82                 | -4.1                                         | 0.8589                   |
| 2          | DEL.42973    | 69,833,090                  | 71,702,178                  | Peri.           | 150          | 13           | 7.98                  | 128                        | 4            | 3.03                  | -163.2                                       | 0.0360                   |
| 2          | DEL.48980    | 178,134,254                 | 183,563,424                 | Peri.           | 131          | 13           | 9.03                  | 113                        | 5            | 4.24                  | -113.1                                       | 0.0694                   |
| 5          | DEL.92285    | 43,094,158                  | 44,371,298                  | Peri.           | 131          | 13           | 9.03                  | 113                        | 5            | 4.24                  | -113.1                                       | 0.0694                   |
| 5          | DEL.96846    | 147,538,205                 | 151,042,601                 | Peri.           | 131          | 13           | 9.03                  | 113                        | 5            | 4.24                  | -113.1                                       | 0.0694                   |
| 7          | INS.95452    | 19,624,345                  | 20,468,482                  | Peri.           | 125          | 21           | 14.38                 | 106                        | 17           | 13.82                 | -4.1                                         | 0.8589                   |
| 7          | INS.100248   | 121,191,052                 | 125,104,915                 | Peri.           | 125          | 21           | 14.38                 | 106                        | 17           | 13.82                 | -4.1                                         | 0.8589                   |

Arms, chromosomal arms; Peri., pericentromeric regions.

**Table S3. Comparison of the numbers of HEI10 foci between B73/Mo17;+/+ and B73/Mo17;mop1/mop1**

| B73/Mo17;+/+ (WT) |            | B73/Mo17;mop1/mop1 (mutant) |            |
|-------------------|------------|-----------------------------|------------|
| Meiocyte          | HEI10 foci | Meiocyte                    | HEI10 foci |
| WT-1              | 21         | mt-2                        | 18         |
| WT-2              | 20         | mt-3                        | 21         |
| WT-3              | 21         | mt-4                        | 17         |
| WT-4              | 18         | mt-5                        | 20         |
| WT-5              | 20         | mt-7                        | 17         |
| WT-6              | 18         | mt-8                        | 19         |
| WT-7              | 19         | mt-9                        | 19         |
| WT-8              | 21         | mt-10                       | 18         |
| WT-9              | 20         | mt-11                       | 19         |
| WT-10             | 22         | mt-12                       | 17         |
| WT-11             | 21         | mt-14                       | 21         |
| WT-12             | 21         | mt-15                       | 19         |
| WT-13             | 21         | mt-16                       | 21         |
| WT-14             | 22         | mt-17                       | 21         |
| WT-15             | 21         | mt-18                       | 18         |
| WT-17             | 21         | mt-19                       | 17         |
| WT-18             | 18         | mt-20                       | 22         |
| WT-19             | 20         | mt-22                       | 19         |
| WT-20             | 22         | mt-23                       | 16         |
| WT-21             | 21         | mt-26                       | 21         |
| WT-23             | 22         | mt-28                       | 24         |
| WT-24             | 19         |                             |            |
| WT-26             | 21         |                             |            |
| WT-27             | 21         |                             |            |

**Table S4. Summary of the whole genome bisulfite sequencing data**

| Sample name | Genotype                   | Clean reads | Bisulfite conversion rate (%) | Replicate   |
|-------------|----------------------------|-------------|-------------------------------|-------------|
| 1982-6      | B73/Mo17;+/+               | 76,153,365  | 99.2                          | Replicate 1 |
| 1982-5      | B73/Mo17; <i>mop1/mop1</i> | 75,214,817  | 99.2                          |             |
| 1983-16     | B73/Mo17;+/+               | 81,377,469  | 99.0                          | Replicate 2 |
| 1983-26     | B73/Mo17; <i>mop1/mop1</i> | 68,479,889  | 99.2                          |             |



**Table S5. Meiotic recombination rates between B73/Mo17;+/+ and B73/Mo17;lb11/lb11 along chromosome 5 in maize**

| Chromosomes | Markers    | Marker position v2 | Marker position v4 | B73/Mo17;+/+ |              |                       | B73/Mo17;lb11/lb11 |              |                       | Recombinants in lb11/lb11 vs. +/+ (%) | P value of $\chi^2$ test |
|-------------|------------|--------------------|--------------------|--------------|--------------|-----------------------|--------------------|--------------|-----------------------|---------------------------------------|--------------------------|
|             |            |                    |                    | Parental     | Recombinants | Genetic distance (CM) | Parental           | Recombinants | Genetic distance (CM) |                                       |                          |
|             | DEL.88310  | 899,349            | 935,600            |              |              |                       |                    |              |                       |                                       |                          |
|             | DEL.88604  | 2,762,137          | 2,844,642          | 234          | 17           | 6.77                  | 206                | 8            | 3.74                  | -44.8                                 | 0.0773                   |
|             | INS.72301  | 10,086,976         | 10,492,066         | 187          | 63           | 25.20                 | 164                | 50           | 23.36                 | -7.3                                  | 0.5363                   |
|             | INS.72736  | 15,139,215         | 15,682,110         | 215          | 29           | 11.89                 | 176                | 30           | 14.56                 | 22.5                                  | 0.2350                   |
|             | INS.74132  | 31,823,952         | 32,947,840         | 184          | 30           | 14.02                 | 172                | 29           | 14.43                 | 2.9                                   | 0.8673                   |
| Zm5         | DEL.92285  | 43,094,158         | 44,371,297         | 198          | 14           | 6.60                  | 185                | 14           | 7.04                  | 6.5                                   | 0.8064                   |
|             | DEL.96846  | 147,538,205        | 151,042,600        | 209          | 32           | 13.28                 | 173                | 35           | 16.83                 | 26.7                                  | 0.1315                   |
|             | DEL.99134  | 175,449,608        | 179,470,138        | 211          | 31           | 12.81                 | 177                | 35           | 16.51                 | 28.9                                  | 0.1070                   |
|             | DEL.100248 | 188,858,032        | 193,893,000        | 205          | 33           | 13.87                 | 188                | 22           | 10.48                 | -24.4                                 | 0.1552                   |
|             | DEL.101474 | 201,464,758        | 206,962,580        | 210          | 30           | 12.50                 | 184                | 26           | 12.38                 | -1.0                                  | 0.9584                   |
|             | INS.82912  | 215,984,724        | 221,868,272        | 156          | 90           | 36.59                 | 137                | 77           | 35.98                 | -1.7                                  | 0.8544                   |

**Dataset S1 (separate file).** Primer sequences of the InDel markers used in this study.

**Dataset S2 (separate file).** Comparison of recombination frequency in the backcross populations derived from B73/Mo17;*mop1/mop1* and B73/Mo17;*mop1/+*.

**Dataset S3 (separate file).** Meiotic recombination rates between B73/Mo17;*mop1/mop1* and B73/Mo17;*mop1/+* along six entire maize chromosomes.

**Dataset S4 (separate file).** Comparison of recombination frequency in the backcross populations of two biological replicates derived from B73/Mo17;*+/+* and B73/Mo17;*lbf1/lbf1*.

## SI References

1. S. Liu et al., Mu transposon insertion sites and meiotic recombination events co-localize with epigenetic marks for open chromatin across the maize genome. *PLoS Genet* 5, e1000733 (2009).
2. C. Rezvoy, D. Charif, L. Gueguen, G. A. Marais, MareyMap: an R-based tool with graphical interface for estimating recombination rates. *Bioinformatics* 23, 2188-2189 (2007).
